# Supplementary material for: Dietary Intake of Adults Who Participate in CrossFit® Exercise Regimens
Source: MDPI journal article supplement (doi:10.3390/sports10030038), 2022-03-05
Supplement: s1 [file s1]

## Supplementary Material

**File S1:** Intake survey.

### Informed consent

- Q1: UNIVERSITY OF GEORGIA - CONSENT FORM
  - o I agree to the above informed consent and begin the survey
  - o I do not agree to the above informed consent

### Inclusion criteria

- Q2: Are you currently 19 or more years of age?
  - o Yes
  - o No
- Q3: Do you currently and have been participating in a regular CrossFit® exercise regimen for at least 6 months?
  - o Yes
  - o No

### Demographics

- Q4: What is your e-mail address?
- Q5: What is your race?
  - o American Indian or Alaska Native
  - o Asian
  - o Black or African American
  - o Native Hawaiian or other Pacific Islander
  - o Hispanic
  - o Latino or Spanish origin
  - o White
  - o I prefer not to answer
- Q6: What is your height in inches?
- Q7: What is your weight in pounds?
- Q8: What is your body composition?
  - o Body composition is the proportion of fat and non-fat mass in your body. It is represented as a percentage of fat mass. If measuring your body composition at home, please list a measurement that was taken in the morning after you voided your bladder. If you do not know, please leave blank.
- Q9: What is your waist circumference in inches?
  - o To measure your waist circumference: stand and place a tape measure around your middle, just above your hipbones. Make sure tape is horizontal around the waist. Keep the tape snug around the waist, but not compressing the skin. If you do not know your waist circumference, please leave blank
- Q10: What is your hip circumference in inches?
  - o To measure your hip circumference: stand and place a tape measure around the largest part of your hips. Make sure tape is horizontal around the waist. Keep the tape snug around the hips, but not compressing the skin. If you do not know your hip circumference, please leave blank

### Nutritional goals

- Q11: What is your current nutritional goal? Check all that apply.
  - Weight loss
  - Weight maintenance
  - Weight gain
  - Gain muscle mass
  - Lose fat mass
  - Support performance
  - Other \_\_\_\_\_
- Q12: How long has this been your nutritional goal?

### Exercise habits

- Q13: How many years have you been participating in CrossFit®?
- Q14: What is your current fitness goal? Check all that apply.
  - Cardiovascular endurance
  - Strength
  - Overall well-being
  - Flexibility
  - Other: \_\_\_\_\_
- Q15: On average, how many days a week do you participate in:
  - CrossFit® class (~1 hr in duration)?
  - Additional strength specific training sessions (e.g., powerlifting or Olympic lifting) outside of a traditional CrossFit® class?
  - Additional cardiovascular specific training sessions (e.g., running, cycling, etc) outside of a traditional CrossFit® class?
  - Additional flexibility specific training sessions (e.g., yoga) outside of a traditional CrossFit® class?

### Clinical outcomes

- Q16: What is your resting heart rate?
- Q17: What is your resting blood pressure?
- Q18: Have you been diagnosed with any of the following? Check all that apply.
  - Hypertension
  - Dyslipidemia
  - Atherosclerosis
  - Heart disease
  - Heart attack or failure
  - Stroke
  - Low bone density
  - Pre-diabetes
  - Type-2 diabetes
  - Cirrhosis of the liver
  - Depression
  - Anxiety disorder
  - Attention deficit disorder (ADD)
  - Attention deficit hyperactivity disorder (ADHD)

- Post-traumatic stress disorder (PTSD)
- Q19: Please list all prescription medications and reason for taking.
- Q20: Since you have been participating in CrossFit®, has your physician change your diagnosis or medication for any previous diseases or disorders?
  - Yes
  - No
- Q21: Since you have been participating in CrossFit®, have you experienced a change in any symptoms associated with any disease or disorder?
  - Yes
  - No

**Supplemental Table S1.** Summary of multiple linear regression formulas with dietary intake as the dependent variables.

| Dependent Variable                                 | Formula                                                                                             |
|----------------------------------------------------|-----------------------------------------------------------------------------------------------------|
| kcal·d <sup>-1</sup>                               | 2261.87 + 540.70 (sex) – 14.95 (age) + 411.19 (goal: WG)                                            |
| kcal·kg <sup>-1</sup> ·d <sup>-1</sup> (weighted)  | 46.21 – 0.64 (BMI) – 0.13 (age) + 0.34 (EXS) – 1.98 (goal: LFM) + 6.50 (goal: WG) – 2.56 (goal: WL) |
| CHO % energy                                       | 46.49 – 2.56 (sex) – 0.15 (age) + 0.32 (EXS) + 4.47 (goal: WG)                                      |
| CHO g·d <sup>-1</sup>                              | 242.92 + 45.33 (sex) – 2.19 (age) + 3.98 (EXS) – 22.54 (goal: WL) + 66.98 (goal: WG)                |
| CHO g·kg <sup>-1</sup> ·d <sup>-1</sup> (weighted) | 4.61 – 0.05 (BMI) – 0.02 (age) + 0.05 (EXS) – 0.41 (goal: WL) + 1.18 (goal: WG)                     |
| Fiber g·d <sup>-1</sup>                            | 24.76 + 5.23 (sex) – 0.21 (age) + 0.63 (EXS) – 3.23 (goal: LFM) + 3.09 (goal: SP)                   |
| PRO g·d <sup>-1</sup>                              | 109.34 + 34.04 (sex) – 0.77 (age) + 1.82 (EXS)                                                      |
| PRO g·kg <sup>-1</sup> ·d <sup>-1</sup> (weighted) | 4.61 + 0.20 (sex) – 0.05 (BMI) – 0.01 (age) + 0.02 (EXS)                                            |
| Fat % energy                                       | 30.67 – 2.11 (sex) – 0.12 (age) – 3.52 (goal: WG)                                                   |
| Fat g·d <sup>-1</sup> (weighted)                   | 75.31 + 23.74 (sex) – 0.34 (age) + 6.26 (goal: SP)                                                  |
| Fat g·kg <sup>-1</sup> ·d <sup>-1</sup> (weighted) | 1.93 + 0.14 (sex) – 0.03 (BMI) – 0.004 (age)                                                        |
| SFA g·d <sup>-1</sup> (weighted)                   | 23.61 + 6.57 (sex) – 0.10 (age)                                                                     |
| MUFA g·d <sup>-1</sup> (weighted)                  | 27.42 + 10.17 (sex) – 0.10 (age) + 2.73 (goal: SP)                                                  |
| PUFA g·d <sup>-1</sup>                             | 16.82 + 4.89 (sex) – 0.10 (age) + 0.41 (EXS) – 1.49 (goal: LFM)                                     |
| CHOL mg·d <sup>-1</sup> (weighted)                 | 273.24 + 135.05 (sex) + 51.05 (goal: SP)                                                            |
| ALC % energy (weighted)                            | 1.31 + 0.05 (age) – 0.11 (EXS)                                                                      |
| ALC g·d <sup>-1</sup> (weighted)                   | 3.68 + 0.11 (age) – 0.31 (EXS)                                                                      |
| ALC g·kg <sup>-1</sup> ·d <sup>-1</sup> (weighted) | 10.06 + 0.001 (age) – 0.004 (EXS)                                                                   |
| Micronutrient Score                                | 0.101 – 0.01 (sex) – 0.001 (BMI) + 0.001 (EXS) + 0.01 (goal: WL)                                    |

Note: Unstandardized Beta reported with (Std. Error). Weighted multiple linear regression is adjusted by amount of prediction error associated with the dependent variable to control for heteroscedasticity found in the unweighted model. CHO, carbohydrate; PRO, protein; ALC, alcohol; BMI, body mass index (kg·m<sup>2</sup>); EXS, exercise frequency (sessions·wk<sup>-1</sup>); Sex, sex is coded as 0 = female, 1 = male; LFM, nutritional goal of lose fat mass, coded as 0 = no, 1 = yes; WL, nutritional goal of weight loss, coded as 0 = no, 1 = yes; SP, nutritional goal of support performance, coded as 0 = no, 1 = yes; WG, nutritional goal of weight gain, coded as 0 = no, 1 = yes; g, gram; kg, kilogram; mg, milligram; d, day.

**Supplemental Table S2:** Correlations between dietary intake, exercise habits, resting heart rate, blood pressure, sex, BMI, age, exercise frequency, and nutritional and fitness goals.

|                                                            | Sex     | BMI     | Age     | EXS     | LFM     | WL      | SP      | WM     | GMM    | WG     | CVE | OW  | S   |
|------------------------------------------------------------|---------|---------|---------|---------|---------|---------|---------|--------|--------|--------|-----|-----|-----|
| Energy (kcal·d <sup>-1</sup> )                             | 0.316*  | 0.031   | -0.180* | 0.114*  | -0.135* | -0.145* | 0.081*  | -0.044 | 0.028  | 0.185* | N/A | N/A | N/A |
| Energy (kcal·kg <sup>-1</sup> ·d <sup>-1</sup> , weighted) | 0.031   | -0.315* | -0.128* | 0.106*  | -0.172* | -0.232* | 0.095*  | 0.009  | 0.049  | 0.160* | N/A | N/A | N/A |
| CHO (% energy)                                             | -0.136* | 0.016   | -0.220* | 0.105*  | -0.011  | -0.033  | -0.055  | -0.027 | 0.025  | 0.092* | N/A | N/A | N/A |
| CHO (g·d <sup>-1</sup> )                                   | 0.219*  | 0.022   | -0.233* | 0.135*  | -0.130* | -0.141* | 0.047   | -0.061 | 0.022  | 0.205* | N/A | N/A | N/A |
| CHO (g·kg <sup>-1</sup> ·d <sup>-1</sup> , weighted)       | 0.026   | -0.326* | -0.196* | 0.158*  | -0.190* | -0.292* | 0.116*  | 0.002  | 0.034  | 0.207* | N/A | N/A | N/A |
| PRO (% energy)                                             | 0.003   | -0.018  | 0.013   | 0.020   | 0.050   | 0.073   | 0.024   | -0.055 | -0.027 | -0.065 | N/A | N/A | N/A |
| PRO (g·d <sup>-1</sup> )                                   | 0.311*  | 0.042   | -0.139* | 0.130*  | -0.081* | -0.096* | 0.081*  | -0.055 | 0.030  | 0.139* | N/A | N/A | N/A |
| PRO (g·kg <sup>-1</sup> ·d <sup>-1</sup> )                 | 0.071   | -0.254* | -0.107* | 0.111*  | -0.115* | -0.173* | 0.126*  | -0.004 | 0.017  | 0.095* | N/A | N/A | N/A |
| Fat (% energy)                                             | 0.144*  | -0.016  | 0.206*  | -0.063  | -0.038  | 0.0001  | 0.067   | 0.035  | -0.034 | 0.088* | N/A | N/A | N/A |
| Fat (g·d <sup>-1</sup> , weighted)                         | 0.305*  | 0.029   | -0.105* | 0.071   | -0.112* | -0.105* | 0.092*  | -0.017 | 0.012  | 0.117* | N/A | N/A | N/A |
| Fat (g·kg <sup>-1</sup> ·d <sup>-1</sup> , weighted)       | 0.073   | -0.372* | -0.054  | 0.098*  | -0.159* | -0.262* | 0.139*  | 0.015  | 0.058  | 0.114* | N/A | N/A | N/A |
| ALC (% energy, weighted)                                   | -0.171* | -0.086* | 0.331*  | -0.369* | 0.264*  | 0.186*  | -0.159* | 0.192* | 0.144* | 0.047  | N/A | N/A | N/A |
| ALC (g·d <sup>-1</sup> , weighted)                         | 0.124*  | -0.011  | 0.197*  | -0.195* | 0.065   | 0.001   | -0.09   | 0.089* | 0.029  | 0.022  | N/A | N/A | N/A |
| ALC (g·kg <sup>-1</sup> ·d <sup>-1</sup> , weighted)       | 0.042   | -0.090* | 0.183*  | -0.201* | 0.072   | -0.028  | 0.012   | 0.096* | 0.057  | 0.012  | N/A | N/A | N/A |
| Dietary fiber (g·d <sup>-1</sup> )                         | 0.198*  | -0.052  | -0.168* | 0.176*  | -0.159* | -0.129* | 0.140*  | -0.070 | 0.039  | 0.107* | N/A | N/A | N/A |
| SFA (g·d <sup>-1</sup> , weighted)                         | 0.265*  | 0.026   | -0.088* | -0.007  | -0.089* | -0.115* | 0.090*  | 0.005  | 0.008  | 0.107* | N/A | N/A | N/A |
| MUFA (g·d <sup>-1</sup> , weighted)                        | 0.318*  | 0.007   | -0.062  | 0.078*  | -0.130* | -0.100* | 0.094*  | -0.027 | 0.015  | 0.095* | N/A | N/A | N/A |
| PUFA (g·d <sup>-1</sup> )                                  | 0.290*  | 0.037   | -0.107* | 0.169*  | -0.131* | -0.105* | 0.080*  | -0.043 | 0.025  | 0.115* | N/A | N/A | N/A |

|                                               |         |         |         |         |        |         |        |         |        |        |        |         |        |
|-----------------------------------------------|---------|---------|---------|---------|--------|---------|--------|---------|--------|--------|--------|---------|--------|
| CHOL (mg·d <sup>-1</sup> , weighted)          | 0.249*  | 0.008   | -0.015  | -0.018  | -0.033 | -0.074† | 0.104* | -0.002  | -0.035 | 0.099* | N/A    | N/A     | N/A    |
| Micronutrient Score                           | -0.189* | -0.131* | -0.025  | 0.110*  | 0.043  | 0.095*  | 0.079* | -0.088* | 0.0001 | -0.015 | N/A    | N/A     | N/A    |
| Total exercise sessions                       | 0.042   | 0.011   | -0.068  | N/A     | N/A    | N/A     | N/A    | N/A     | N/A    | N/A    | 0.168* | -0.138* | 0.083* |
| CrossFit® sessions·wk <sup>-1</sup>           | 0.066   | 0.054   | -0.020  | N/A     | N/A    | N/A     | N/A    | N/A     | N/A    | N/A    | 0.031  | 0.060   | -0.009 |
| Additional aerobic sessions·wk <sup>-1</sup>  | -0.012  | -0.026  | -0.020  | N/A     | N/A    | N/A     | N/A    | N/A     | N/A    | N/A    | 0.171* | -0.093* | 0.038  |
| Additional strength sessions·wk <sup>-1</sup> | 0.035   | 0.002   | -0.086* | N/A     | N/A    | N/A     | N/A    | N/A     | N/A    | N/A    | 0.101* | -0.202* | 0.118* |
| Resting heart rate (bpm)                      | -0.221* | 0.137*  | -0.016  | -0.171* | N/A    | N/A     | N/A    | N/A     | N/A    | N/A    | N/A    | N/A     | N/A    |
| Systolic blood pressure (mmHg)                | 0.365*  | 0.272*  | 0.065   | -0.022  | N/A    | N/A     | N/A    | N/A     | N/A    | N/A    | N/A    | N/A     | N/A    |
| Diastolic blood pressure (mmHg)               | 0.216*  | 0.252*  | -0.019  | 0.050   | N/A    | N/A     | N/A    | N/A     | N/A    | N/A    | N/A    | N/A     | N/A    |

Note: BMI, body mass index (kg·m<sup>2</sup>); EXS, exercise frequency (sessions·wk<sup>-1</sup>); Sex, sex is coded as 0 = female, 1 = male; Nutritional goals coded as 0 = no, 1 = yes; LFM, nutritional goal of lose fat mas, coded as 0 = no, 1 = yes; WL, nutritional goal of weight loss, coded as 0 = no, 1 = yes; SP, nutritional goal of support performance, coded as 0 = no, 1 = yes; WM, nutritional goal of weight maintenance, coded as 0 = no, 1 = yes; GMM, nutritional goal of gain muscle mass, coded as 0 = no, 1 = yes; WG, nutritional goal of weight gain, coded as 0 = no, 1 = yes; CVE, fitness goal of cardiovascular endurance, coded as 0 = no, 1 = yes; OW, fitness goal of overall wellbeing, coded as 0 = no, 1 = yes; S, fitness goal of strength, coded as 0 = no, 1 = yes; CHO, carbohydrate; PRO, protein; ALC, alcohol; SFA, saturated fatty acids; MUFA, monounsaturated fatty acids; PUFA, polyunsaturated fatty acids; CHOL, cholesterol; kcals, kilocalories; N/A, not applicable; kg, kilogram; g, gram; % energy, percent of total energy·d<sup>-1</sup>; bpm, beats·min<sup>-1</sup>; mmHg, millimeters of mercury. Weighted multiple linear regression is adjusted by amount of prediction error associated with the dependent variable to control for heteroscedasticity found in the unweighted model. \* $P \leq 0.05$  (1-tailed); †  $P = 0.060$ .

**Supplemental Table S3** Results of multiple linear regression analysis with absolute energy, and carbohydrate, fat, and alcohol percent of total energy as the dependent variables

| Step                 | Dependent variables            |                    |        |                |                 |        |                |                 |        |                          |                 |        |
|----------------------|--------------------------------|--------------------|--------|----------------|-----------------|--------|----------------|-----------------|--------|--------------------------|-----------------|--------|
|                      | Energy (kcal·d <sup>-1</sup> ) |                    |        | CHO (% energy) |                 |        | Fat (% energy) |                 |        | ALC (% energy, weighted) |                 |        |
|                      | IV                             | B                  | P      | IV             | B               | P      | IV             | B               | P      | IV                       | B               | P      |
| 1                    | Sex                            | 521.19<br>(74.60)  | <0.001 | Age            | -0.18<br>(0.04) | <0.001 | Age            | 0.14<br>(0.03)  | <0.001 | EXS                      | -0.15<br>(0.02) | <0.001 |
| 2                    | Sex                            | 574.85<br>(73.26)  | <0.001 | Age            | -0.17<br>(0.04) | <0.001 | Age            | 0.12<br>(0.03)  | <0.001 | EXS                      | -0.11<br>(0.02) | <0.001 |
|                      | Age                            | -15.91<br>(3.08)   | <0.001 | Sex            | -2.09<br>(0.91) | 0.023  | Sex            | 1.81<br>(0.73)  | 0.013  | Age                      | 0.05<br>(0.01)  | <0.001 |
| 3                    | Sex                            | 540.70<br>(74.42)  | <0.001 | Age            | -0.16<br>(0.04) | <0.001 | Age            | 0.12<br>(0.03)  | <0.001 |                          |                 |        |
|                      | Age                            | -14.95<br>(3.10)   | <0.001 | Sex            | -2.18<br>(0.91) | 0.017  | Sex            | 2.11<br>(0.74)  | 0.005  |                          |                 |        |
|                      | WG                             | 411.19<br>(179.47) | 0.022  | EXS            | 0.32<br>(0.15)  | 0.039  | WG             | -3.52<br>(1.78) | 0.049  |                          |                 |        |
| 4                    |                                |                    |        | Age            | -0.15<br>(0.04) | <0.001 |                |                 |        |                          |                 |        |
|                      |                                |                    |        | Sex            | -2.56<br>(0.93) | 0.006  |                |                 |        |                          |                 |        |
|                      |                                |                    |        | EXS            | 0.32<br>(0.15)  | 0.038  |                |                 |        |                          |                 |        |
|                      |                                |                    |        | WG             | 4.47<br>(2.23)  | 0.046  |                |                 |        |                          |                 |        |
| Total R <sup>2</sup> |                                | 0.161              |        |                | 0.077           |        |                | 0.064           |        |                          | 0.165           |        |

Note: Unstandardized Beta reported with (Std. Error). Weighted multiple linear regression is adjusted by amount of prediction error associated with the dependent variable to control for heteroscedasticity found in the unweighted model. EXS, exercise frequency (sessions·wk<sup>-1</sup>); Sex, coded as 0 = female, 1 = male; WG, nutritional goal of weight gain, coded as 0 = no, 1 = yes; kcal, kilocalories; CHO, carbohydrate; ALC, alcohol; % energy, percent of total energy·d<sup>-1</sup>.

**Supplemental Table S4** Results of multiple linear regression analysis with absolute macronutrient and micronutrient score variables as the dependent variables

| Step                 | Dependent variables      |                   |        |                          |                 |        |                                    |                 |        |                                    |                 |        |                     |                    |        |
|----------------------|--------------------------|-------------------|--------|--------------------------|-----------------|--------|------------------------------------|-----------------|--------|------------------------------------|-----------------|--------|---------------------|--------------------|--------|
|                      | CHO (g·d <sup>-1</sup> ) |                   |        | PRO (g·d <sup>-1</sup> ) |                 |        | Fat (g·d <sup>-1</sup> , weighted) |                 |        | ALC (g·d <sup>-1</sup> , weighted) |                 |        | Micronutrient Score |                    |        |
|                      | IV                       | B                 | P      | IV                       | B               | P      | IV                                 | B               | P      | IV                                 | B               | P      | IV                  | B                  | P      |
| 1                    | Age                      | -2.11<br>(0.42)   | <0.001 | Sex                      | 31.89<br>(4.65) | <0.001 | Sex                                | 22.76<br>(3.35) | <0.001 | Age                                | 0.13<br>(0.03)  | <0.001 | Sex                 | -0.01<br>(0.002)   | <0.001 |
| 2                    | Age                      | -2.44<br>(0.41)   | <0.001 | Sex                      | 34.61<br>(4.61) | <0.001 | Sex                                | 23.75<br>(3.33) | <0.001 | Age                                | 0.11<br>(0.03)  | <0.001 | Sex                 | -0.10<br>(0.002)   | <0.001 |
|                      | Sex                      | 55.49<br>(9.75)   | <0.001 | Age                      | -0.81<br>(0.19) | <0.001 | Age                                | -0.35<br>(0.11) | 0.003  | EXS                                | -0.31<br>(0.09) | <0.001 | EXS                 | 0.001<br>(0.0001)  | 0.011  |
| 3                    | Age                      | -2.28<br>(0.41)   | <0.001 | Sex                      | 34.04<br>(4.60) | <0.001 | Sex                                | 23.74<br>(3.37) | <0.001 |                                    |                 |        | Sex                 | -0.01<br>(0.002)   | <0.001 |
|                      | Sex                      | 49.58<br>(9.87)   | <0.001 | Age                      | -0.77<br>(0.19) | <0.001 | Age                                | -0.34<br>(0.11) | 0.003  |                                    |                 |        | EXS                 | 0.001<br>(0.0001)  | 0.011  |
|                      | WG                       | 71.17<br>(23.80)  | 0.003  | EXS                      | 1.82<br>(0.78)  | 0.020  | SP                                 | 6.26<br>(3.15)  | 0.048  |                                    |                 |        | BMI                 | -0.001<br>(0.001)  | 0.039  |
|                      | Age                      | -2.20<br>(0.41)   | <0.001 |                          |                 |        |                                    |                 |        |                                    |                 |        | Sex                 | -0.01<br>(0.003)   | 0.004  |
| 4                    | Sex                      | 48.36<br>(9.83)   | <0.001 |                          |                 |        |                                    |                 |        |                                    |                 |        | EXS                 | 0.001<br>(0.0001)  | 0.011  |
|                      | WG                       | 71.10<br>(23.67)  | 0.003  |                          |                 |        |                                    |                 |        |                                    |                 |        | BMI                 | -0.001<br>(0.0001) | 0.003  |
|                      | EXS                      | 3.93<br>(1.63)    | 0.016  |                          |                 |        |                                    |                 |        |                                    |                 |        | WL                  | 0.01<br>(0.003)    | 0.013  |
|                      | Age                      | -2.19<br>(0.41)   | <0.001 |                          |                 |        |                                    |                 |        |                                    |                 |        |                     |                    |        |
| 5                    | Sex                      | 45.33<br>(9.90)   | <0.001 |                          |                 |        |                                    |                 |        |                                    |                 |        |                     |                    |        |
|                      | WG                       | 66.98<br>(23.66)  | 0.005  |                          |                 |        |                                    |                 |        |                                    |                 |        |                     |                    |        |
|                      | EXS                      | 3.98<br>(1.63)    | 0.015  |                          |                 |        |                                    |                 |        |                                    |                 |        |                     |                    |        |
|                      | WL                       | -22.54<br>(10.89) | 0.039  |                          |                 |        |                                    |                 |        |                                    |                 |        |                     |                    |        |
| Total R <sup>2</sup> |                          | 0.156             |        |                          | 0.141           |        |                                    | 0.119           |        |                                    | 0.064           |        |                     | 0.072              |        |

Note: Unstandardized Beta reported with (Std. Error). Weighted multiple linear regression is adjusted by amount of prediction error associated with the dependent variable to control for heteroscedasticity found in the unweighted model. BMI, body mass index (kg·m<sup>2</sup>); EXS, exercise frequency (sessions·wk<sup>-1</sup>); Sex, sex is coded as 0 = female, 1 = male; WG, nutritional goal of weight gain, coded as 0 = no, 1 = yes; WL, nutritional goal of weight loss, coded as 0 = no, 1 = yes; SP, nutritional goal of support performance, coded as 0 = no, 1 = yes; kcals, kilocalories; kg, kilogram; g, gram; CHO, carbohydrate; PRO, protein; ALC, alcohol; %, percent of total energy·d<sup>-1</sup>.

**Supplemental Table S5** Results of weighted multiple linear regression analysis with relative macronutrient variables as the dependent variables

| Step                 | Dependent variables                                             |                 |        |                                                      |                 |        |                                                      |                  |        |                                                      |                   |        |                                                      |                   |        |
|----------------------|-----------------------------------------------------------------|-----------------|--------|------------------------------------------------------|-----------------|--------|------------------------------------------------------|------------------|--------|------------------------------------------------------|-------------------|--------|------------------------------------------------------|-------------------|--------|
|                      | Energy (kcal·kg <sup>-1</sup> ·d <sup>-1</sup> ,<br>(weighted)) |                 |        | CHO (g·kg <sup>-1</sup> ·d <sup>-1</sup> , weighted) |                 |        | PRO (g·kg <sup>-1</sup> ·d <sup>-1</sup> , weighted) |                  |        | Fat (g·kg <sup>-1</sup> ·d <sup>-1</sup> , weighted) |                   |        | ALC (g·kg <sup>-1</sup> ·d <sup>-1</sup> , weighted) |                   |        |
|                      | IV                                                              | B               | P      | IV                                                   | B               | P      | IV                                                   | B                | P      | IV                                                   | B                 | P      | IV                                                   | B                 | P      |
| 1                    | BMI                                                             | -0.75<br>(0.11) | <0.001 | BMI                                                  | -0.07<br>(0.01) | <0.001 | BMI                                                  | -0.04<br>(0.01)  | <0.001 | BMI                                                  | -0.03<br>(0.003)  | <0.001 | EXS                                                  | -0.01<br>(0.001)  | <0.001 |
| 2                    | BMI                                                             | -0.79<br>(0.11) | <0.001 | BMI                                                  | -0.07<br>(0.01) | <0.001 | BMI                                                  | -0.04<br>(0.01)  | <0.001 | BMI                                                  | -0.03<br>(0.003)  | <0.001 | EXS                                                  | -0.004<br>(0.001) | <0.001 |
|                      | Age                                                             | -0.14<br>(0.04) | <0.001 | Age                                                  | -0.03<br>(0.01) | <0.001 | Age                                                  | -0.01<br>(0.003) | 0.006  | Sex                                                  | 0.13<br>(0.04)    | 0.002  | Age                                                  | 0.001<br>(0.0001) | 0.002  |
| 3                    | BMI                                                             | -0.74<br>(0.11) | <0.001 | BMI                                                  | -0.06<br>(0.01) | <0.001 | BMI                                                  | -0.04<br>(0.01)  | <0.001 | BMI                                                  | -0.03<br>(0.003)  | <0.001 |                                                      |                   |        |
|                      | Age                                                             | -0.15<br>(0.04) | <0.001 | Age                                                  | -0.03<br>(0.01) | <0.001 | Age                                                  | -0.01<br>(0.003) | <0.001 | Sex                                                  | 0.14<br>(0.04)    | <0.001 |                                                      |                   |        |
|                      | LFM                                                             | -2.67<br>(0.91) | 0.003  | WG                                                   | 1.28<br>(0.35)  | <0.001 | Sex                                                  | 0.21<br>(0.06)   | 0.001  | Age                                                  | -0.004<br>(0.002) | 0.011  |                                                      |                   |        |
| 4                    | BMI                                                             | -0.73<br>(0.11) | <0.001 | BMI                                                  | -0.05<br>(0.01) | 0.001  | BMI                                                  | -0.05<br>(0.01)  | <0.001 |                                                      |                   |        |                                                      |                   |        |
|                      | Age                                                             | -0.13<br>(0.04) | <0.001 | Age                                                  | -0.03<br>(0.01) | 0.001  | Age                                                  | -0.01<br>(0.003) | 0.021  |                                                      |                   |        |                                                      |                   |        |
|                      | LFM                                                             | -2.29<br>(0.92) | 0.013  | WG                                                   | 1.19<br>(0.35)  | 0.001  | Sex                                                  | 0.20<br>(0.06)   | 0.002  |                                                      |                   |        |                                                      |                   |        |
|                      | WG                                                              | 6.89<br>(2.82)  | 0.015  | WL                                                   | -0.42<br>(0.13) | 0.002  | EXS                                                  | 0.02<br>(0.01)   | 0.020  |                                                      |                   |        |                                                      |                   |        |
| 5                    | BMI                                                             | -0.64<br>(0.11) | <0.001 | BMI                                                  | -0.05<br>(0.01) | <0.001 |                                                      |                  |        |                                                      |                   |        |                                                      |                   |        |
|                      | Age                                                             | -0.13<br>(0.04) | <0.001 | Age                                                  | -0.02<br>(0.01) | <0.001 |                                                      |                  |        |                                                      |                   |        |                                                      |                   |        |
|                      | LFM                                                             | -2.02<br>(0.92) | 0.029  | WG                                                   | 1.18<br>(0.35)  | <0.001 |                                                      |                  |        |                                                      |                   |        |                                                      |                   |        |
|                      | WG                                                              | 6.56<br>(2.81)  | 0.020  | WL                                                   | -0.41<br>(0.13) | 0.002  |                                                      |                  |        |                                                      |                   |        |                                                      |                   |        |
|                      | WL                                                              | -2.53<br>(1.14) | 0.027  | EXS                                                  | 0.05<br>(0.02)  | 0.018  |                                                      |                  |        |                                                      |                   |        |                                                      |                   |        |
| 6                    | BMI                                                             | -0.64<br>(0.11) | <0.001 |                                                      |                 |        |                                                      |                  |        |                                                      |                   |        |                                                      |                   |        |
|                      | Age                                                             | -0.13<br>(0.04) | <0.001 |                                                      |                 |        |                                                      |                  |        |                                                      |                   |        |                                                      |                   |        |
|                      | LFM                                                             | -1.98<br>(0.92) | 0.031  |                                                      |                 |        |                                                      |                  |        |                                                      |                   |        |                                                      |                   |        |
|                      | WG                                                              | 6.50<br>(2.80)  | 0.020  |                                                      |                 |        |                                                      |                  |        |                                                      |                   |        |                                                      |                   |        |
|                      | WL                                                              | -2.56<br>(1.13) | 0.024  |                                                      |                 |        |                                                      |                  |        |                                                      |                   |        |                                                      |                   |        |
|                      | EXS                                                             | 0.34<br>(0.15)  | 0.030  |                                                      |                 |        |                                                      |                  |        |                                                      |                   |        |                                                      |                   |        |
| Total R <sup>2</sup> |                                                                 | 0.173           |        |                                                      | 0.207           |        |                                                      | 0.112            |        |                                                      | 0.169             |        |                                                      | 0.062             |        |



Note: Unstandardized Beta reported with (Std. Error). Weighted multiple linear regression is adjusted by amount of prediction error associated with the dependent variable to control for heteroscedasticity found in the unweighted model. BMI, body mass index ( $\text{kg}\cdot\text{m}^2$ ); EXS, exercise frequency ( $\text{sessions}\cdot\text{wk}^{-1}$ ); Sex, sex is coded as 0 = female, 1 = male; LFM, nutritional goal of lose fat mass, coded as 0 = no, 1 = yes; WG, nutritional goal of weight gain, coded as 0 = no, 1 = yes; WL, nutritional goal of weight loss, coded as 0 = no, 1 = yes; kcals, kilocalories; kg, kilogram; g, gram; CHO, carbohydrate; PRO, protein; ALC, alcohol; %, percent of total  $\text{energy}\cdot\text{d}^{-1}$ .

**Supplemental Table S6** Results of multiple linear regression analysis with dietary fiber, SFA, MUFA, PUFA, and CHOL as the dependent variables

[illegible]

|             |                 |       |       |       |       |  |
|-------------|-----------------|-------|-------|-------|-------|--|
| EXS         | 0.63<br>(0.20)  | 0.002 |       |       |       |  |
| LFM         | -3.23<br>(1.14) | 0.005 |       |       |       |  |
| SP          | 3.09<br>(1.24)  | 0.013 |       |       |       |  |
| Total $R^2$ | 0.132           | 0.084 | 0.118 | 0.136 | 0.073 |  |

Note: Unstandardized Beta reported with (Std. Error). Weighted multiple linear regression is adjusted by amount of prediction error associated with the dependent variable to control for heteroscedasticity found in the unweighted model. BMI, body mass index ( $\text{kg}\cdot\text{m}^2$ ); EXS, exercise frequency ( $\text{sessions}\cdot\text{wk}^{-1}$ ); Sex, sex is coded as 0 = female, 1 = male; LFM, nutritional goal of lose fat mass, coded as 0 = no, 1 = yes; SP, nutritional goal of support performance, coded as 0 = no, 1 = yes; SFA, saturated fatty acids; MUFA, monounsaturated fatty acids; PUFA, polyunsaturated fatty acids; CHOL, cholesterol; g, gram; mg, milligram.

**Supplemental Table S7:** Vitamin and mineral intake used to calculate micronutrient score.

| Micronutrient                                               | All ( <i>n</i> = 449) | Female ( <i>n</i> = 290) | Male ( <i>n</i> = 159) | ANOVA       |
|-------------------------------------------------------------|-----------------------|--------------------------|------------------------|-------------|
| Vitamin A ( $\mu\text{g}\cdot\text{d}^{-1}$ )               | 543.63 (394.12)       | 474.20 (278.52)          | 670.27 (522.84)        | $P < 0.001$ |
| Vitamin B <sub>1</sub> ( $\text{mg}\cdot\text{d}^{-1}$ )    | 1.88 (0.88)           | 1.76 (0.77)              | 2.09 (1.02)            | $P < 0.001$ |
| Vitamin B <sub>2</sub> ( $\text{mg}\cdot\text{d}^{-1}$ )    | 3.01 (1.34)           | 2.80 (1.18)              | 3.39 (1.52)            | $P < 0.001$ |
| Vitamin B <sub>3</sub> ( $\text{mg}\cdot\text{d}^{-1}$ )    | 31.50 (17.08)         | 28.67 (15.97)            | 36.66 (17.86)          | $P < 0.001$ |
| Vitamin B <sub>5</sub> ( $\text{mg}\cdot\text{d}^{-1}$ )    | 8.16 (3.72)           | 7.32 (2.98)              | 9.69 (4.40)            | $P < 0.001$ |
| Vitamin B <sub>6</sub> ( $\text{mg}\cdot\text{d}^{-1}$ )    | 3.06 (1.88)           | 2.82 (1.83)              | 3.51 (1.90)            | $P < 0.001$ |
| Vitamin B <sub>9</sub> ( $\mu\text{g}\cdot\text{d}^{-1}$ )  | 503.85 (253.62)       | 462.85 (217.26)          | 578.63 (295.51)        | $P < 0.001$ |
| Vitamin B <sub>12</sub> ( $\mu\text{g}\cdot\text{d}^{-1}$ ) | 6.13 (4.72)           | 5.32 (4.01)              | 7.61 (5.52)            | $P < 0.001$ |
| Vitamin C ( $\text{mg}\cdot\text{d}^{-1}$ )                 | 143.20 (92.44)        | 135.14 (80.92)           | 157.89 (109.16)        | $P = 0.012$ |
| Vitamin D ( $\mu\text{g}\cdot\text{d}^{-1}$ )               | 5.99 (4.31)           | 5.37 (3.76)              | 7.14 (4.98)            | $P < 0.001$ |
| Vitamin E ( $\text{mg}\cdot\text{d}^{-1}$ )                 | 13.71 (7.49)          | 12.64 (6.85)             | 15.68 (8.20)           | $P < 0.001$ |
| Vitamin K ( $\mu\text{g}\cdot\text{d}^{-1}$ )               | 433.19 (476.26)       | 426.56 (495.74)          | 445.28 (439.76)        | $P > 0.05$  |
| Choline ( $\text{mg}\cdot\text{d}^{-1}$ )                   | 464.09 (213.89)       | 413.20 (174.89)          | 556.91 (245.66)        | $P < 0.001$ |
| Calcium ( $\text{mg}\cdot\text{d}^{-1}$ )                   | 1256.08 (570.15)      | 1173.51 (477.74)         | 1406.69 (684.79)       | $P < 0.001$ |
| Copper ( $\text{mg}\cdot\text{d}^{-1}$ )                    | 1.90 (0.86)           | 1.71 (0.65)              | 2.23 (1.08)            | $P < 0.001$ |
| Iron ( $\text{mg}\cdot\text{d}^{-1}$ )                      | 16.20 (7.54)          | 14.85 (6.17)             | 18.67 (9.06)           | $P < 0.001$ |
| Magnesium ( $\text{mg}\cdot\text{d}^{-1}$ )                 | 448.28 (185.72)       | 416.03 (155.72)          | 507.11 (219.22)        | $P < 0.001$ |
| Manganese ( $\text{mg}\cdot\text{d}^{-1}$ )                 | 4.16 (2.06)           | 3.90 (1.77)              | 4.64 (2.44)            | $P < 0.001$ |
| Phosphorus ( $\text{mg}\cdot\text{d}^{-1}$ )                | 1692.47 (715.87)      | 1535.36 (565.82)         | 1979.02 (859.98)       | $P < 0.001$ |
| Potassium ( $\text{mg}\cdot\text{d}^{-1}$ )                 | 3472.13 (1488.32)     | 3203.33 (1210.12)        | 3962.39 (1796.56)      | $P < 0.001$ |
| Selenium ( $\mu\text{g}\cdot\text{d}^{-1}$ )                | 120.19 (56.69)        | 107.80 (46.69)           | 142.78 (65.81)         | $P < 0.001$ |
| Sodium ( $\text{mg}\cdot\text{d}^{-1}$ )                    | 3527.09 (1524.35)     | 3205.50 (1302.75)        | 4113.65 (1717.04)      | $P < 0.001$ |
| Zinc ( $\text{mg}\cdot\text{d}^{-1}$ )                      | 13.21 (6.12)          | 11.61 (4.53)             | 16.12 (7.46)           | $P < 0.001$ |

Note:  $\mu\text{g}$ , microgram; mg, milligram; Vitamin B<sub>1</sub>, Thiamin; Vitamin B<sub>2</sub>, Riboflavin, Vitamin B<sub>3</sub>, Niacin; Vitamin B<sub>5</sub>, Pantothenic Acid; Vitamin B<sub>6</sub>, Pyridoxine; Vitamin B<sub>9</sub>, Folate; Vitamin B<sub>12</sub>, Cobalamin.

**Supplemental Table S8** Results of multiple linear regression analysis with total exercise sessions, and additional aerobic and strength exercise sessions as the dependent variables

| Step        | Dependent variables     |                 |        |                             |                 |        |                              |                 |        |
|-------------|-------------------------|-----------------|--------|-----------------------------|-----------------|--------|------------------------------|-----------------|--------|
|             | Total exercise sessions |                 |        | Additional aerobic sessions |                 |        | Additional strength sessions |                 |        |
|             | IV                      | B               | P      | IV                          | B               | P      | IV                           | B               | P      |
| 1           | CVE                     | 1.03<br>(0.29)  | <0.001 | CVE                         | 0.61<br>(0.17)  | <0.001 | OW                           | -0.78<br>(0.18) | <0.001 |
| 2           | CVE                     | 1.10<br>(0.29)  | <0.001 | CVE                         | 0.63<br>(0.17)  | <0.001 | OW                           | -0.81<br>(0.18) | <0.001 |
|             | OW                      | -1.05<br>(0.33) | 0.001  | OW                          | -0.43<br>(0.19) | 0.024  | CVE                          | 0.39<br>(0.16)  | 0.013  |
| Total $R^2$ |                         | 0.051           |        |                             | 0.041           |        |                              | 0.054           |        |

Note: Unstandardized Beta reported with (Std. Error). CVE, fitness goal of cardiovascular endurance, coded as 0 = no, 1 = yes; OW, fitness goal of overall wellbeing, coded as 0 = no, 1 = yes; IV, independent variable.

**Supplemental Table S9** Results of multiple linear regression analysis with heart rate and blood pressure as the dependent variables

| Step        | Dependent variables      |                 |        |            |                |        |            |                |        |
|-------------|--------------------------|-----------------|--------|------------|----------------|--------|------------|----------------|--------|
|             | Resting Heart Rate (bpm) |                 |        | SBP (mmHg) |                |        | DBP (mmHg) |                |        |
|             | IV                       | B               | P      | IV         | B              | P      | IV         | B              | P      |
| 1           | Sex                      | -4.12<br>(0.92) | <0.001 | Sex        | 8.06<br>(1.29) | <0.001 | BMI        | 0.47<br>(0.11) | <0.001 |
| 2           | Sex                      | -4.88<br>(0.92) | <0.001 | Sex        | 6.99<br>(1.31) | <0.001 | BMI        | 0.39<br>(0.12) | <0.001 |
|             | BMI                      | 0.40<br>(0.10)  | <0.001 | BMI        | 0.47<br>(0.15) | 0.001  | Sex        | 2.75<br>(1.04) | 0.009  |
| 3           | Sex                      | -4.78<br>(0.91) | <0.001 |            |                |        |            |                |        |
|             | BMI                      | 0.40<br>(0.10)  | <0.001 |            |                |        |            |                |        |
|             | EXS                      | -0.52<br>(0.15) | <0.001 |            |                |        |            |                |        |
| Total $R^2$ |                          | 0.112           |        |            | 0.168          |        |            | 0.088          |        |

Note: Unstandardized Beta reported with (Std. Error). BMI, body mass index ( $\text{kg}\cdot\text{m}^2$ ); EXS, exercise frequency ( $\text{sessions}\cdot\text{wk}^{-1}$ ); Sex, sex is coded as 0 = female, 1 = male; SBP, systolic blood pressure; DBP, diastolic blood pressure; bpm,  $\text{beats}\cdot\text{min}^{-1}$ ; mmHg, millimeters of mercury.
